# Supplementary material for: Predictors of early remission of proteinuria in adult patients with minimal change disease: a retrospective cohort study
Source: PubMed Central journal article supplement (PMC9192725; doi:10.1038/s41598-022-13067-7), 2022-06-13
Supplement: 41598_2022_13067_MOESM1_ESM.pdf [file 41598_2022_13067_MOESM1_ESM.pdf]

## Supplementary tables

**Table S1.** Clinical characteristics of 108 adult patients with minimal change disease stratified by serum albumin concentration of  $\leq 1.00$ , 1.01–1.50, 1.51–2.00, and  $> 2.00$  g/dL.

**Table S2.** Clinical characteristics of 108 adult patients with minimal change disease stratified by eGFR level of  $< 30.0$ , 30.0–59.9, 60.0–89.9, and  $\geq 90.0$  mL/min/1.73 m<sup>2</sup>

**Table S3.** Clinical characteristics of 108 adult patients with minimal change disease stratified by urinary protein level of 3.5–4.9, 5.0–7.4, 7.5–9.9, and  $\geq 10.0$  g/day or g/gCr.

**Table S1.** Clinical characteristics of 108 adult patients with minimal change disease stratified by serum albumin concentration.

| Serum albumin, g/dL                                         | All               | ≤1.00             | 1.01–1.50         | 1.51–2.00         | >2.00             |
|-------------------------------------------------------------|-------------------|-------------------|-------------------|-------------------|-------------------|
|                                                             | 1.7±0.6           | 0.9 (0.8, 0.9)    | 1.4 (1.2, 1.5)    | 1.8 (1.7, 2.0)    | 2.3 (2.2, 2.7)    |
| Number                                                      | 108               | 12                | 41                | 28                | 27                |
| <b>Baseline characteristics at initiating IST</b>           |                   |                   |                   |                   |                   |
| Age, years*                                                 | 43 (30, 64)       | 30 (21, 40)       | 42 (26, 65)       | 48 (32, 73)       | 44 (37, 58)       |
| 18–39 years, n (%)                                          | 49 (45.4)         | 9 (75.0)          | 20 (48.8)         | 11 (39.3)         | 9 (33.3)          |
| 40–64                                                       | 32 (29.6)         | 3 (25.0)          | 10 (24.4)         | 7 (25.0)          | 12 (44.4)         |
| 65–81                                                       | 27 (25.0)         | 0 (0.0)           | 11 (26.8)         | 10 (35.7)         | 6 (22.2)          |
| Male, n (%)                                                 | 66 (61.1)         | 7 (58.3)          | 28 (68.3)         | 15 (53.6)         | 16 (59.3)         |
| Body mass index, kg/m <sup>2</sup>                          | 24.1±4.2          | 26.3±3.7          | 23.6±4.1          | 23.9±4.3          | 23.9±4.4          |
| Systolic blood pressure, mmHg                               | 121±16            | 119±15            | 121±16            | 122±15            | 124±18            |
| Diastolic blood pressure, mmHg                              | 73±11             | 69±13             | 72±11             | 73±10             | 76±10             |
| Serum creatinine, mg/dL                                     | 0.87 (0.70, 1.24) | 0.97 (0.70, 1.23) | 0.95 (0.71, 1.25) | 0.87 (0.70, 1.16) | 0.83 (0.66, 1.50) |
| eGFR, mL/min/1.73 m <sup>2</sup>                            | 67±27             | 71±21             | 66±27             | 66±25             | 67±33             |
| <30 mL/min/1.73 m <sup>2</sup>                              | 11 (10.2)         | 0 (0.0)           | 5 (12.2)          | 1 (3.6)           | 5 (18.5)          |
| 30–59                                                       | 28 (25.9)         | 3 (25.0)          | 12 (29.3)         | 9 (32.1)          | 4 (14.8)          |
| 60–89                                                       | 48 (44.4)         | 6 (50.0)          | 17 (41.5)         | 13 (46.4)         | 12 (44.4)         |
| ≥90                                                         | 21 (19.4)         | 3 (25.0)          | 7 (17.1)          | 5 (17.9)          | 6 (22.2)          |
| Urinary protein, g/day or g/gCr*                            | 7.8 (5.1, 10.7)   | 10.1 (8.0, 13.5)  | 7.0 (5.1, 10.0)   | 8.6 (5.6, 12.9)   | 7.1 (4.2, 9.5)    |
| Dipstick hematuria - or ±, N (%)                            | 48 (44.4)         | 4 (33.3)          | 21 (51.2)         | 10 (35.7)         | 13 (48.1)         |
| 1+                                                          | 20 (18.5)         | 3 (25.0)          | 5 (12.2)          | 7 (25.0)          | 5 (18.5)          |
| ≥2+                                                         | 40 (37.0)         | 5 (41.7)          | 15 (36.6)         | 11 (39.3)         | 9 (33.3)          |
| RAS blockade, n (%)                                         | 15 (13.9)         | 0 (0.0)           | 6 (14.6)          | 5 (17.9)          | 4 (14.8)          |
| Intravenous albumin administration, n (%)*                  | 12 (11.1)         | 1 (8.3)           | 1 (2.4)           | 7 (25.0)          | 3 (11.1)          |
| <b>Use of immunosuppressive drugs within 1 month of IST</b> |                   |                   |                   |                   |                   |
| Oral PSL, n (%)                                             | 107 (99.1)        | 12 (100.0)        | 41 (100.0)        | 27 (96.4)         | 27 (100.0)        |
| Intravenous mPSL, n (%)                                     | 28 (25.9)         | 4 (33.3)          | 11 (26.8)         | 7 (25.0)          | 6 (22.2)          |
| Cyclosporine, n (%)                                         | 12 (11.1)         | 1 (8.3)           | 3 (7.3)           | 3 (10.7)          | 5 (18.5)          |

|                                                      |            |            |           |            |           |
|------------------------------------------------------|------------|------------|-----------|------------|-----------|
| Rituximab, n (%)                                     | 1 (0.9)    | 0 (0.0)    | 0 (0.0)   | 1 (3.6)    | 0 (0.0)   |
| <b>Cumulative incidence of remission and relapse</b> |            |            |           |            |           |
| Remission, n (%)                                     | 104 (96.3) | 12 (100.0) | 40 (97.6) | 28 (100.0) | 23 (88.9) |
| Remission within 6 months of IST, n (%)              | 97 (89.8)  | 12 (100.0) | 39 (95.1) | 24 (85.7)  | 22 (81.5) |
| Relapse after remission, n (%) <sup>†</sup>          | 42 (43.3)  | 3 (25.0)   | 21 (53.8) | 11 (45.8)  | 7 (31.8)  |

Mean±standard deviation; median (25%, 75%)

eGFR, estimated glomerular filtration rate; IST, immunosuppressive therapy; mPSL, methylprednisolone; PSL, prednisolone; RAS, renin-angiotensin system

\*P <0.05 for analysis of variance, the Kruskal-Wallis test, the chi-square test, or the Fisher's exact test, as appropriately.

<sup>†</sup>Incidence of relapse in 97 patients with remission within 6 months of IST.

**Table S2.** Clinical characteristics of 108 adult patients with minimal change disease stratified by eGFR level.

| eGFR, mL/min/1.73 m <sup>2</sup>                            | All               | <30.0             | 30.0–59.9        | 60.0–89.9        | ≥90.0            |
|-------------------------------------------------------------|-------------------|-------------------|------------------|------------------|------------------|
|                                                             | 67±27             | 16 (14–24)        | 44 (38–52)       | 77 (67–82)       | 101 (94–106)     |
| Number                                                      | 108               | 11                | 28               | 48               | 21               |
| <b>Baseline characteristics at initiating IST</b>           |                   |                   |                  |                  |                  |
| Age, years*                                                 | 43 (30, 64)       | 51 (20–75)        | 59 (37–74)       | 46 (33–61)       | 26 (21–36)       |
| 18–39 years, n (%)*                                         | 49 (45.4)         | 4 (36.4)          | 8 (28.6)         | 19 (39.6)        | 18 (85.7)        |
| 40–64                                                       | 32 (29.6)         | 3 (27.3)          | 9 (32.1)         | 18 (37.5)        | 2 (9.5)          |
| 65–81                                                       | 27 (25.0)         | 4 (36.4)          | 11 (39.3)        | 11 (22.9)        | 1 (4.8)          |
| Male, n (%)                                                 | 66 (61.1)         | 8 (72.7)          | 18 (64.3)        | 28 (58.3)        | 12 (57.1)        |
| Body mass index, kg/m <sup>2</sup> *                        | 24.1±4.2          | 26.2±3.8          | 25.2±4.9         | 23.9±3.9         | 21.9±3.2         |
| Systolic blood pressure, mmHg*                              | 121±16            | 133±13            | 125±18           | 121±15           | 112±10           |
| Diastolic blood pressure, mmHg*                             | 73±11             | 76±10             | 75±11            | 73±11            | 68±9             |
| Serum creatinine, mg/dL*                                    | 0.87 (0.70, 1.24) | 2.91 (2.23, 4.14) | 1.24 (1.09–1.39) | 0.74 (0.66–0.97) | 0.70 (0.61–0.78) |
| Serum albumin, g/dL                                         | 1.67±0.56         | 1.88±0.60         | 1.54±0.46        | 1.67±0.55        | 1.73±0.64        |
| ≤1.00 g/dL, N (%)                                           | 12 (11.1)         | 0 (0.0)           | 3 (10.7)         | 6 (12.5)         | 3 (14.3)         |
| 1.01–1.50                                                   | 41 (38.0)         | 5 (45.5)          | 12 (42.9)        | 17 (35.4)        | 7 (33.3)         |
| 1.51–2.00                                                   | 28 (25.9)         | 1 (9.1)           | 9 (32.1)         | 13 (27.1)        | 5 (23.8)         |
| >2.00                                                       | 27 (25.0)         | 5 (45.5)          | 4 (14.3)         | 12 (25.0)        | 6 (28.6)         |
| Urinary protein, g/day or g/gCr                             | 7.8 (5.1, 10.7)   | 8.0 (4.8–12.4)    | 9.1 (5.0–13.4)   | 7.6 (5.3–10.2)   | 7.8 (5.4–9.5)    |
| Dipstick hematuria - or ±, N (%)*                           | 48 (44.4)         | 3 (27.3)          | 6 (21.4)         | 26 (54.2)        | 13 (61.9)        |
| 1+                                                          | 20 (18.5)         | 1 (9.1)           | 8 (28.6)         | 7 (14.6)         | 4 (19.0)         |
| ≥2+                                                         | 40 (37.0)         | 7 (63.6)          | 14 (50.0)        | 15 (31.3)        | 4 (19.0)         |
| RAS blockade, n (%)*                                        | 15 (13.9)         | 3 (27.3)          | 7 (25.0)         | 5 (10.4)         | 0 (0.0)          |
| Intravenous albumin administration, n (%)                   | 12 (11.1)         | 2 (18.2)          | 6 (21.4)         | 4 (8.3)          | 0 (0.0)          |
| <b>Use of immunosuppressive drugs within 1 month of IST</b> |                   |                   |                  |                  |                  |
| Oral PSL, n (%)                                             | 107 (99.1)        | 11 (100.0)        | 28 (100.0)       | 47 (97.9)        | 21 (100.0)       |
| Intravenous mPSL, n (%)                                     | 28 (25.9)         | 5 (45.5)          | 9 (32.1)         | 8 (16.7)         | 6 (28.6)         |
| Cyclosporine, n (%)                                         | 12 (11.1)         | 2 (18.2)          | 3 (10.7)         | 5 (10.4)         | 2 (9.5)          |

|                                                      |            |           |            |           |           |
|------------------------------------------------------|------------|-----------|------------|-----------|-----------|
| Rituximab, n (%)                                     | 1 (0.9)    | 0 (0.0)   | 1 (3.6)    | 0 (0.0)   | 0 (0.0)   |
| <b>Cumulative incidence of remission and relapse</b> |            |           |            |           |           |
| Remission, n (%)                                     | 104 (96.3) | 10 (90.9) | 28 (100.0) | 46 (95.8) | 20 (95.2) |
| Remission within 6 months of IST, n (%) <sup>*</sup> | 97 (89.8)  | 6 (54.5)  | 27 (96.4)  | 45 (93.8) | 19 (90.5) |
| Relapse after remission, n (%) <sup>†</sup>          | 42 (43.3)  | 3 (50.0)  | 12 (44.4)  | 18 (40.0) | 9 (47.4)  |

Mean±standard deviation; median (25%, 75%)

eGFR, estimated glomerular filtration rate; IST, immunosuppressive therapy; mPSL, methylprednisolone; PSL, prednisolone; RAS, renin-angiotensin system

<sup>\*</sup>P <0.05 for analysis of variance, the Kruskal-Wallis test, the chi-square test, or the Fisher's exact test, as appropriately.

<sup>†</sup>Incidence of relapse in 97 patients with remission within 6 months of IST.

**Table S3.** Clinical characteristics of 108 adult patients with minimal change disease stratified by urinary protein level.

| Urinary protein, g/day or g/gCr                   | All               | 3.5–4.9           | 5.0–7.4           | 7.5–9.9           | ≥10.0             |
|---------------------------------------------------|-------------------|-------------------|-------------------|-------------------|-------------------|
|                                                   | 7.8 (5.1, 10.7)   | 4.1 (3.7, 4.6)    | 6.0 (5.3, 6.8)    | 8.2 (7.9, 8.9)    | 12.4 (10.7, 15.6) |
| Number                                            | 108               | 23                | 27                | 23                | 35                |
| <b>Baseline characteristics at initiating IST</b> |                   |                   |                   |                   |                   |
| Age, years*                                       | 43 (30, 64)       | 52 (36, 73)       | 49 (36, 67)       | 35 (25, 50)       | 38 (26, 58)       |
| 18–39 years, n (%)*                               | 49 (45.4)         | 7 (30.4)          | 9 (33.3)          | 14 (60.9)         | 19 (54.3)         |
| 40–64                                             | 32 (29.6)         | 5 (21.7)          | 9 (33.3)          | 7 (30.4)          | 11 (31.4)         |
| 65–81                                             | 27 (25.0)         | 11 (47.8)         | 9 (33.3)          | 2 (8.7)           | 5 (14.3)          |
| Male, n (%)                                       | 66 (61.1)         | 15 (65.2)         | 14 (51.9)         | 15 (65.2)         | 22 (62.9)         |
| Body mass index, kg/m <sup>2</sup> *              | 24.1±4.2          | 22.3±3.6          | 23.9±3.4          | 23.8±3.4          | 25.5±5.1          |
| Systolic blood pressure, mmHg                     | 121±16            | 119±15            | 123±15            | 118±13            | 123±19            |
| Diastolic blood pressure, mmHg                    | 73±11             | 70±9              | 73±12             | 75±10             | 74±11             |
| Serum creatinine, mg/dL*                          | 0.87 (0.70, 1.24) | 0.84 (0.70, 1.20) | 0.74 (0.65, 1.18) | 0.80 (0.70, 1.06) | 1.02 (0.87, 1.76) |
| eGFR, mL/min/1.73 m <sup>2</sup>                  | 67±27             | 66±28             | 70±21             | 76±30             | 58±27             |
| <30 mL/min/1.73 m <sup>2</sup>                    | 11 (10.2)         | 3 (13.0)          | 1 (3.7)           | 3 (13.0)          | 4 (11.4)          |
| 30–59                                             | 28 (25.9)         | 7 (30.4)          | 6 (22.2)          | 1 (4.3)           | 14 (40.0)         |
| 60–89                                             | 48 (44.4)         | 8 (34.8)          | 15 (55.6)         | 12 (52.2)         | 13 (37.1)         |
| ≥90                                               | 21 (19.4)         | 5 (21.7)          | 5 (18.5)          | 7 (30.4)          | 4 (11.4)          |
| Serum albumin, g/dL                               | 1.67±0.56         | 1.82±0.54         | 1.69±0.57         | 1.64±0.66         | 1.57±0.47         |
| ≤1.00 g/dL, N (%)                                 | 12 (11.1)         | 0 (0.0)           | 2 (7.4)           | 4 (17.4)          | 6 (17.1)          |
| 1.01–1.50                                         | 41 (38.0)         | 9 (39.1)          | 13 (48.1)         | 8 (34.8)          | 11 (31.4)         |
| 1.51–2.00                                         | 28 (25.9)         | 6 (26.1)          | 5 (18.5)          | 4 (17.4)          | 13 (37.1)         |
| >2.00                                             | 27 (25.0)         | 8 (34.8)          | 7 (25.9)          | 7 (30.4)          | 5 (14.3)          |
| Dipstick hematuria - or ±, N (%)                  | 48 (44.4)         | 12 (52.2)         | 13 (48.1)         | 10 (43.5)         | 13 (37.1)         |
| 1+                                                | 20 (18.5)         | 7 (30.4)          | 3 (11.1)          | 3 (13.0)          | 7 (20.0)          |
| ≥2+                                               | 40 (37.0)         | 4 (17.4)          | 11 (40.7)         | 10 (43.5)         | 15 (42.9)         |
| RAS blockade, n (%)*                              | 15 (13.9)         | 7 (30.4)          | 4 (14.8)          | 1 (4.3)           | 3 (8.6)           |
| Intravenous albumin administration, n (%)         | 12 (11.1)         | 1 (4.3)           | 3 (11.1)          | 1 (4.3)           | 7 (20.0)          |

| <b>Use of Immunosuppressive drugs within 1 month of IST</b> |            |            |           |            |            |
|-------------------------------------------------------------|------------|------------|-----------|------------|------------|
| Oral PSL, n (%)                                             | 107 (99.1) | 23 (100.0) | 26 (96.3) | 23 (100.0) | 35 (100.0) |
| Intravenous mPSL, n (%) <sup>*</sup>                        | 28 (25.9)  | 5 (21.7)   | 2 (7.4)   | 10 (43.5)  | 11 (31.4)  |
| Cyclosporine, n (%)                                         | 12 (11.1)  | 3 (13.0)   | 3 (11.1)  | 3 (13.0)   | 3 (8.6)    |
| Rituximab, n (%)                                            | 1 (0.9)    | 0 (0.0)    | 1 (3.7)   | 0 (0.0)    | 0 (0.0)    |
| <b>Cumulative incidence of remission and relapse</b>        |            |            |           |            |            |
| Remission, n (%) <sup>*</sup>                               | 104 (96.3) | 20 (87.0)  | 26 (96.3) | 23 (100.0) | 35 (100.0) |
| Remission within 6 months of IST, n (%) <sup>*</sup>        | 97 (89.8)  | 6 (54.5)   | 27 (96.3) | 45 (93.8)  | 19 (90.5)  |
| Relapse after remission, n (%) <sup>†</sup>                 | 42 (43.3)  | 3 (50.0)   | 12 (44.4) | 18 (40.0)  | 9 (47.4)   |

Mean±standard deviation; median (25%, 75%)

eGFR, estimated glomerular filtration rate; IST, immunosuppressive therapy; mPSL, methylprednisolone; PSL, prednisolone; RAS, renin-angiotensin system

<sup>\*</sup>P <0.05 for analysis of variance, the Kruskal-Wallis test, the chi-square test, or the Fisher's exact test, as appropriately.

<sup>†</sup>Incidence of relapse in 97 patients with remission within 6 months of IST.
